# Supplementary material for: Outcome at early school age and adolescence after hypothermia-treated hypoxic–ischaemic encephalopathy: an observational, population-based study
Source: HighWire-hosted journal article supplement (doi:10.1136/archdischild-2022-324418), 2022-12-09
Supplement: archdischild-2022-324418supp001_data_supplement.pdf [file archdischild-2022-324418supp001_data_supplement.pdf]

Supplemental Table 1. Swedish national criteria for therapeutic hypothermia in infants born > 36 weeks gestational age. As per Swedish national guidelines, aEEG is not mandatory prior to a decision to initiate treatment with therapeutic hypothermia.

|                                                                                                                                                                                                                                                                                                                                                                                                                              |                                                                                                                   |
|------------------------------------------------------------------------------------------------------------------------------------------------------------------------------------------------------------------------------------------------------------------------------------------------------------------------------------------------------------------------------------------------------------------------------|-------------------------------------------------------------------------------------------------------------------|
| <p>A</p> <ul style="list-style-type: none"> <li>● Apgar score <math>\leq 5</math> at 10 minutes after birth</li> <li>● Continued need for resuscitation (including mask ventilation) at 10 minutes after birth</li> <li>● pH <math>\leq 7.0</math> in cord blood or within 60 minutes after birth (arterial or capillary blood sample)</li> <li>● Base excess <math>\leq -16</math> within 60 minutes after birth</li> </ul> | <p>If <b>ANY</b> of the A-criteria are fulfilled, the infant's neurology is assessed according to B-criteria.</p> |
| <p>B</p> <p>Seizures or moderate to severe HIE defined as the combination of</p> <ul style="list-style-type: none"> <li>● Altered level of consciousness <i>AND</i></li> <li>● Hypotonia or opisthotonus <i>AND</i></li> <li>● Abnormal primitive reflexes</li> </ul>                                                                                                                                                        | <p>Continuously assessed during the first 60 minutes of life</p>                                                  |
