# Supplementary material for: Outcome at early school age and adolescence after hypothermia-treated hypoxic–ischaemic encephalopathy: an observational, population-based study
Source: PubMed Central journal article supplement — Arch Dis Child Fetal Neonatal Ed. 2022 Dec 9;108(3):295–301. doi: 10.1136/archdischild-2022-324418 (PMC10176399; doi:10.1136/archdischild-2022-324418), 2022-12-09
Supplement: fetalneonatal-2022-324418supp001.pdf [file fetalneonatal-2022-324418supp001.pdf]

Supplemental Table 1. Swedish national criteria for therapeutic hypothermia in infants born > 36 weeks gestational age. As per Swedish national guidelines, aEEG is not mandatory prior to a decision to initiate treatment with therapeutic hypothermia.

|                                                                                                                                                                                                                                                                                                                                                                                                                         |                                                                                                                   |
|-------------------------------------------------------------------------------------------------------------------------------------------------------------------------------------------------------------------------------------------------------------------------------------------------------------------------------------------------------------------------------------------------------------------------|-------------------------------------------------------------------------------------------------------------------|
| <p>A</p> <ul style="list-style-type: none"><li>● Apgar score <math>\leq 5</math> at 10 minutes after birth</li><li>● Continued need for resuscitation (including mask ventilation) at 10 minutes after birth</li><li>● pH <math>\leq 7.0</math> in cord blood or within 60 minutes after birth (arterial or capillary blood sample)</li><li>● Base excess <math>\leq -16</math> within 60 minutes after birth</li></ul> | <p>If <b>ANY</b> of the A-criteria are fulfilled, the infant's neurology is assessed according to B-criteria.</p> |
| <p>B</p> <p>Seizures or moderate to severe HIE defined as the combination of</p> <ul style="list-style-type: none"><li>● Altered level of consciousness <i>AND</i></li><li>● Hypotonia or opisthotonus <i>AND</i></li><li>● Abnormal primitive reflexes</li></ul>                                                                                                                                                       | <p>Continuously assessed during the first 60 minutes of life</p>                                                  |
