# Supplementary material for: Outcome at early school age and adolescence after hypothermia-treated hypoxic–ischaemic encephalopathy: an observational, population-based study
Source: PubMed Central journal article supplement — Arch Dis Child Fetal Neonatal Ed. 2022 Dec 9;108(3):295–301. doi: 10.1136/archdischild-2022-324418 (PMC10176399; doi:10.1136/archdischild-2022-324418), 2022-12-09
Supplement: fetalneonatal-2022-324418supp002.pdf [file fetalneonatal-2022-324418supp002.pdf]

Supplemental table 2. Proportion of children scoring  $\leq 15^{\text{th}}$  and  $\leq 5^{\text{th}}$  percentile on motor assessment using the MABC-2 at 6-8 and 10-12 years of age among children who completed assessments on both occasions. Comparison to norms using a binomial test. McNemar test revealed no significant difference between the two assessment occasions neither for the proportion of children scoring  $\leq 15^{\text{th}}$  percentile ( $p=0.791$ ), nor for the proportion of children scoring  $\leq 5^{\text{th}}$  percentile ( $p=0.549$ ). Abbreviations: MABC-2; Movement assessment battery for children, 2<sup>nd</sup> edition; perc, percentile, CI, Confidence interval.

| Motor Assements                  | $\leq 15^{\text{th}}$ perc | %  | 95% CI | p-value | $\leq 5^{\text{th}}$ perc | %  | 95% CI | p-value |
|----------------------------------|----------------------------|----|--------|---------|---------------------------|----|--------|---------|
| MABC-2 at 6-8 years of age (n)   | 11/44                      | 25 | 13-40  | 0.050   | 7/44                      | 16 | 7-30   | 0.001   |
| MABC-2 at 10-12 years of age (n) | 13/44                      | 30 | 17-45  | 0.006   | 10/44                     | 23 | 11-38  | <0.001  |
