# Supplementary material for: Outcome at early school age and adolescence after hypothermia-treated hypoxic–ischaemic encephalopathy: an observational, population-based study
Source: PubMed Central journal article supplement — Arch Dis Child Fetal Neonatal Ed. 2022 Dec 9;108(3):295–301. doi: 10.1136/archdischild-2022-324418 (PMC10176399; doi:10.1136/archdischild-2022-324418), 2022-12-09
Supplement: fetalneonatal-2022-324418supp003.pdf [file fetalneonatal-2022-324418supp003.pdf]

Supplemental Table 3. Number and percentage of children scoring > 90<sup>th</sup> percentile within the separate domains on the Five-to-Fifteen questionnaire at age 6-8 and 10-12 years of age, respectively. Comparison to normative data performed using a binomial test.

| Domain                     | At age 6-8 years             |              |         | At age 10-12 years           |              |                  |
|----------------------------|------------------------------|--------------|---------|------------------------------|--------------|------------------|
|                            | >90 <sup>th</sup> perc n (%) | 95% CI for % | p value | >90 <sup>th</sup> perc n (%) | 95% CI for % | p-value          |
| <b>Motor skills</b>        | 6 (13.6%)                    | 5.3 - 27.9   | n.s.    | 13 (28.9%)                   | 18.2 - 46.6  | <b>&lt;0.001</b> |
| <b>Executive functions</b> | 4 (9.1%)                     | 2.6 - 22.1   | n.s.    | 15 (33.3%)                   | 20.0 - 49.0  | <b>&lt;0.001</b> |
| <b>Perception</b>          | 2 (4.5%)                     | 0.6 - 15.8   | n.s.    | 12 (26.7%)                   | 14.6 - 41.9  | <b>&lt;0.001</b> |
| <b>Memory</b>              | 5 (11.4%)                    | 3.9 - 25.1   | n.s.    | 13 (28.9%)                   | 16.4 - 44.3  | <b>&lt;0.001</b> |
| <b>Language</b>            | 5 (11.4%)                    | 3.9 - 25.1   | n.s.    | 9 (20.0%)                    | 9.6 - 34.6   | <b>0.023</b>     |
| <b>Learning</b>            | 6 (13.6%)                    | 5.3 - 27.9   | n.s.    | 8 (17.8%)                    | 8.0 - 32.1   | n.s.             |
| <b>Social</b>              | 4 (9.1%)                     | 2.6 - 22.1   | n.s.    | 8 (17.8%)                    | 8.0 - 32.1   | n.s.             |
| <b>Emotional</b>           | 3 (6.8%)                     | 1.5 - 19.1   | n.s.    | 8 (17.8%)                    | 8.0 - 32.1   | n.s.             |
