# Supplementary figures and images for: Outcome at early school age and adolescence after hypothermia-treated hypoxic–ischaemic encephalopathy: an observational, population-based study
Source: PubMed Central journal article supplement — Arch Dis Child Fetal Neonatal Ed. 2022 Dec 9;108(3):295–301. doi: 10.1136/archdischild-2022-324418 (PMC10176399; doi:10.1136/archdischild-2022-324418), 2022-12-09

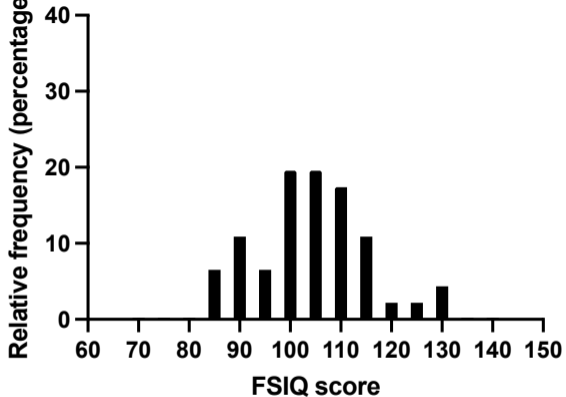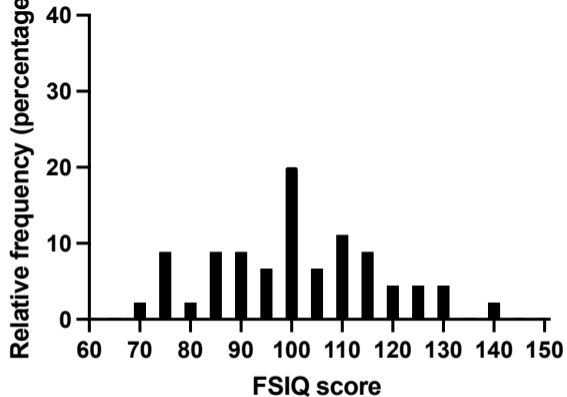

Supplement: fetalneonatal-2022-324418supp004.pdf [file fetalneonatal-2022-324418supp004.pdf]
